# Supplementary material
Source: HighWire-hosted journal article supplement (https://www.jpn.ca/highwire/filestream/89599/field_highwire_adjunct_files/0/jpn-150203-1-at.pdf)
Supplement: jpn-150203-1-at.pdf [file jpn-150203-1-at.pdf]

**Appendix 1** to Stuke H; Gutwinski S, Wiers CE, et al. To drink or not to drink: Harmful drinking is associated with hyperactivation of reward areas rather than hypoactivation of control areas in men. *J Psychiatry Neurosci* 2016.

DOI: 10.1503/jpn.150203

Copyright © 2016 The Author(s) or their employer(s). To receive this resource in an accessible format, please contact us at [cmajgroup@cmaj.ca](mailto:cmajgroup@cmaj.ca).

*Online appendices are unedited and posted as supplied by the authors.*

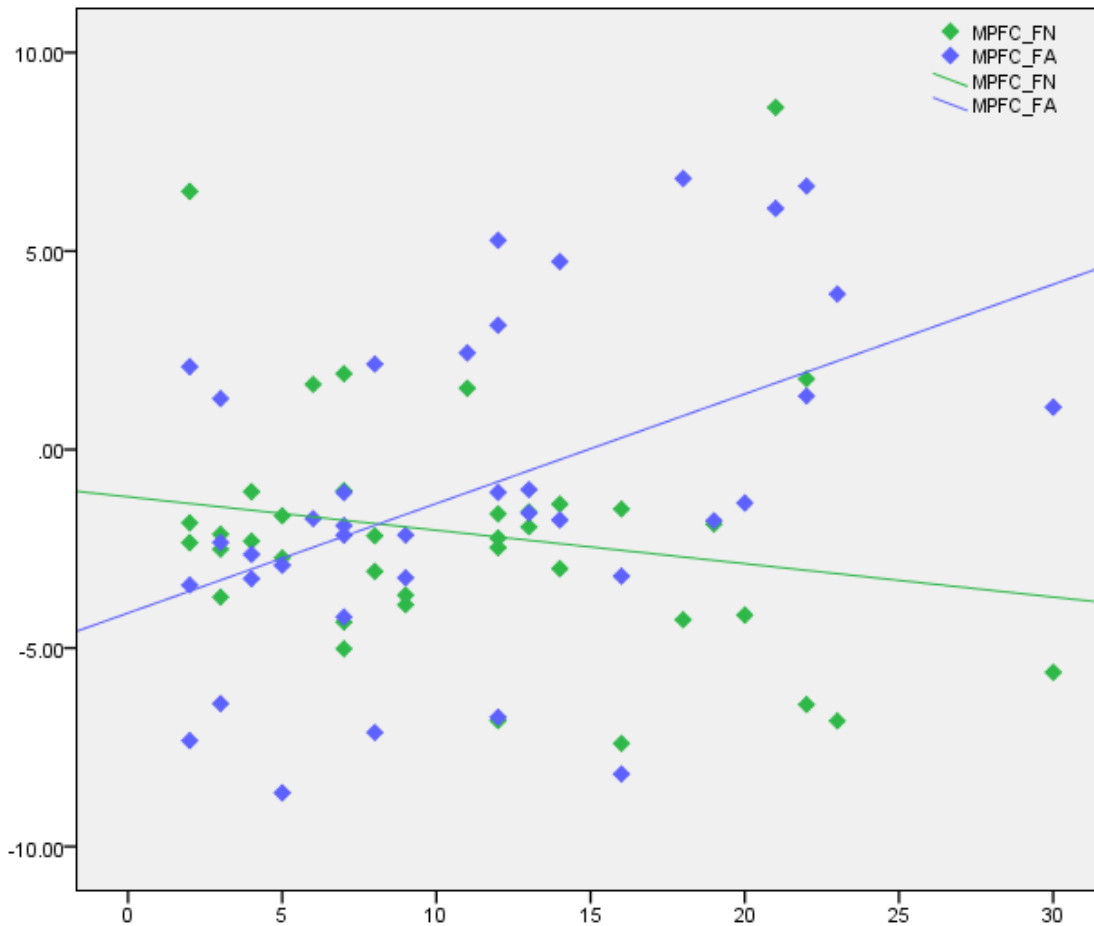

Supplementary Figure 1: Betas (y-axis) for decisions in favor of the desired alcoholic and non-alcoholic drinks (blue and green, respectively) at the peak voxel of the left MPFC (MNI coordinates 0, 60, 18) plotted against AUDIT scores (x-axis)

**Appendix 1** to Stuke H; Gutwinski S, Wiers CE, et al. To drink or not to drink: Harmful drinking is associated with hyperactivation of reward areas rather than hypoactivation of control areas in men. *J Psychiatry Neurosci* 2016.

DOI: 10.1503/jpn.150203

*Online appendices are unedited and posted as supplied by the authors.*

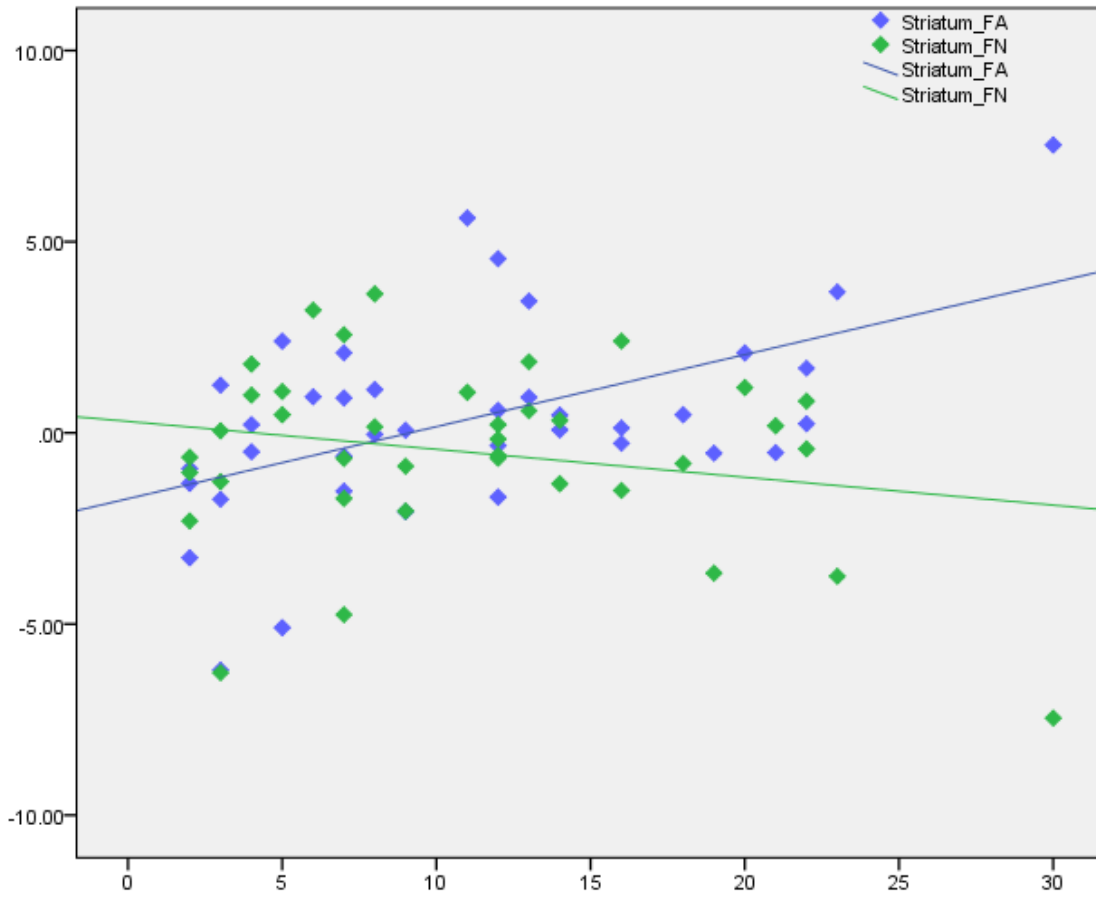

Supplementary Figure 2: Betas (y-axis) for decisions in favor of the more desired alcoholic and non-alcoholic drinks (blue and green, respectively) at the peak voxel of the left striatum (MNI coordinates -4, 7, 4) plotted against AUDIT scores (x-axis)

**Appendix 1** to Stuke H; Gutwinski S, Wiers CE, et al. To drink or not to drink: Harmful drinking is associated with hyperactivation of reward areas rather than hypoactivation of control areas in men. *J Psychiatry Neurosci* 2016.

DOI: 10.1503/jpn.150203

*Online appendices are unedited and posted as supplied by the authors.*

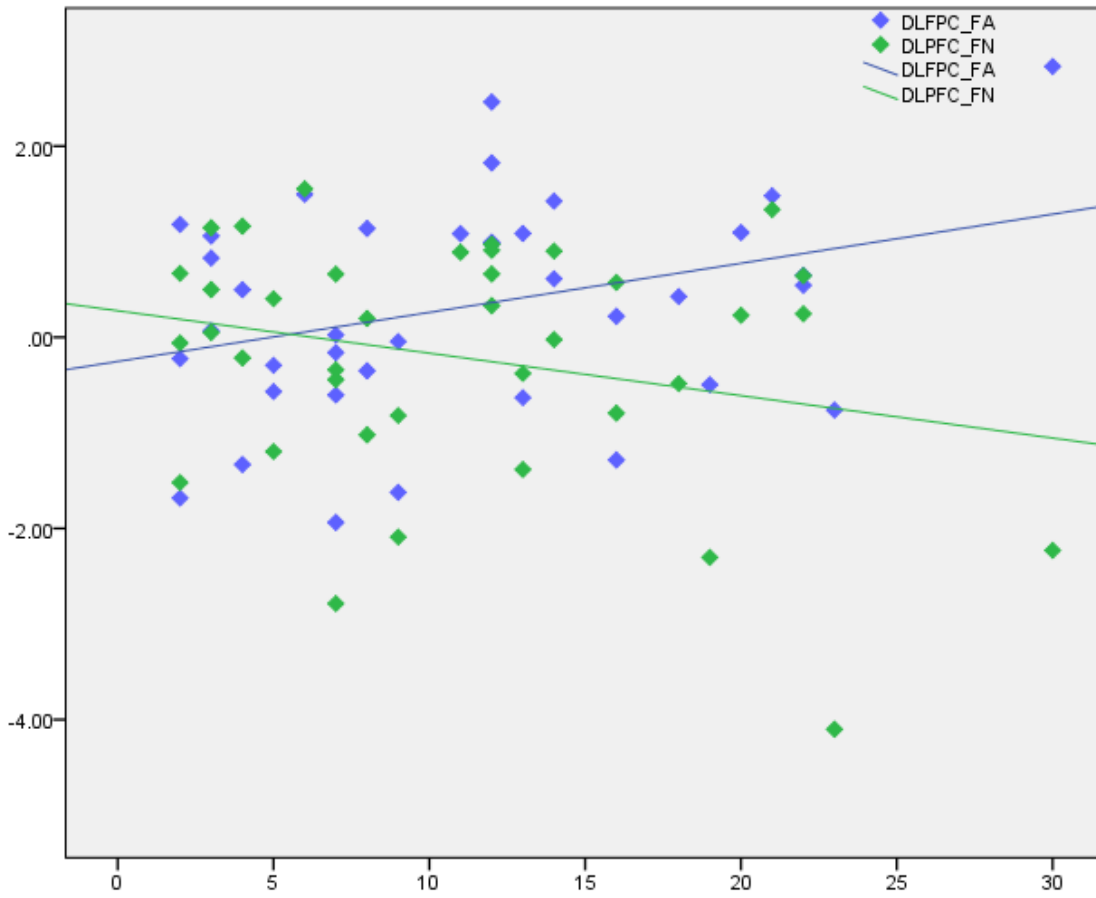

Supplementary Figure 3: Betas (y-axis) for decisions in favor of the more desired alcoholic and non-alcoholic drinks (blue and green, respectively) at the peak voxel of the left DLPFC (MNI coordinates -18, 18, 60) plotted against AUDIT scores (x-axis)
